# Supplementary material
Source: Springer Nature journal article supplement (https://www.springerprofessional.de/resource/supplementary/13688_2013_25_MOESM12_ESM.pdf/11893776)

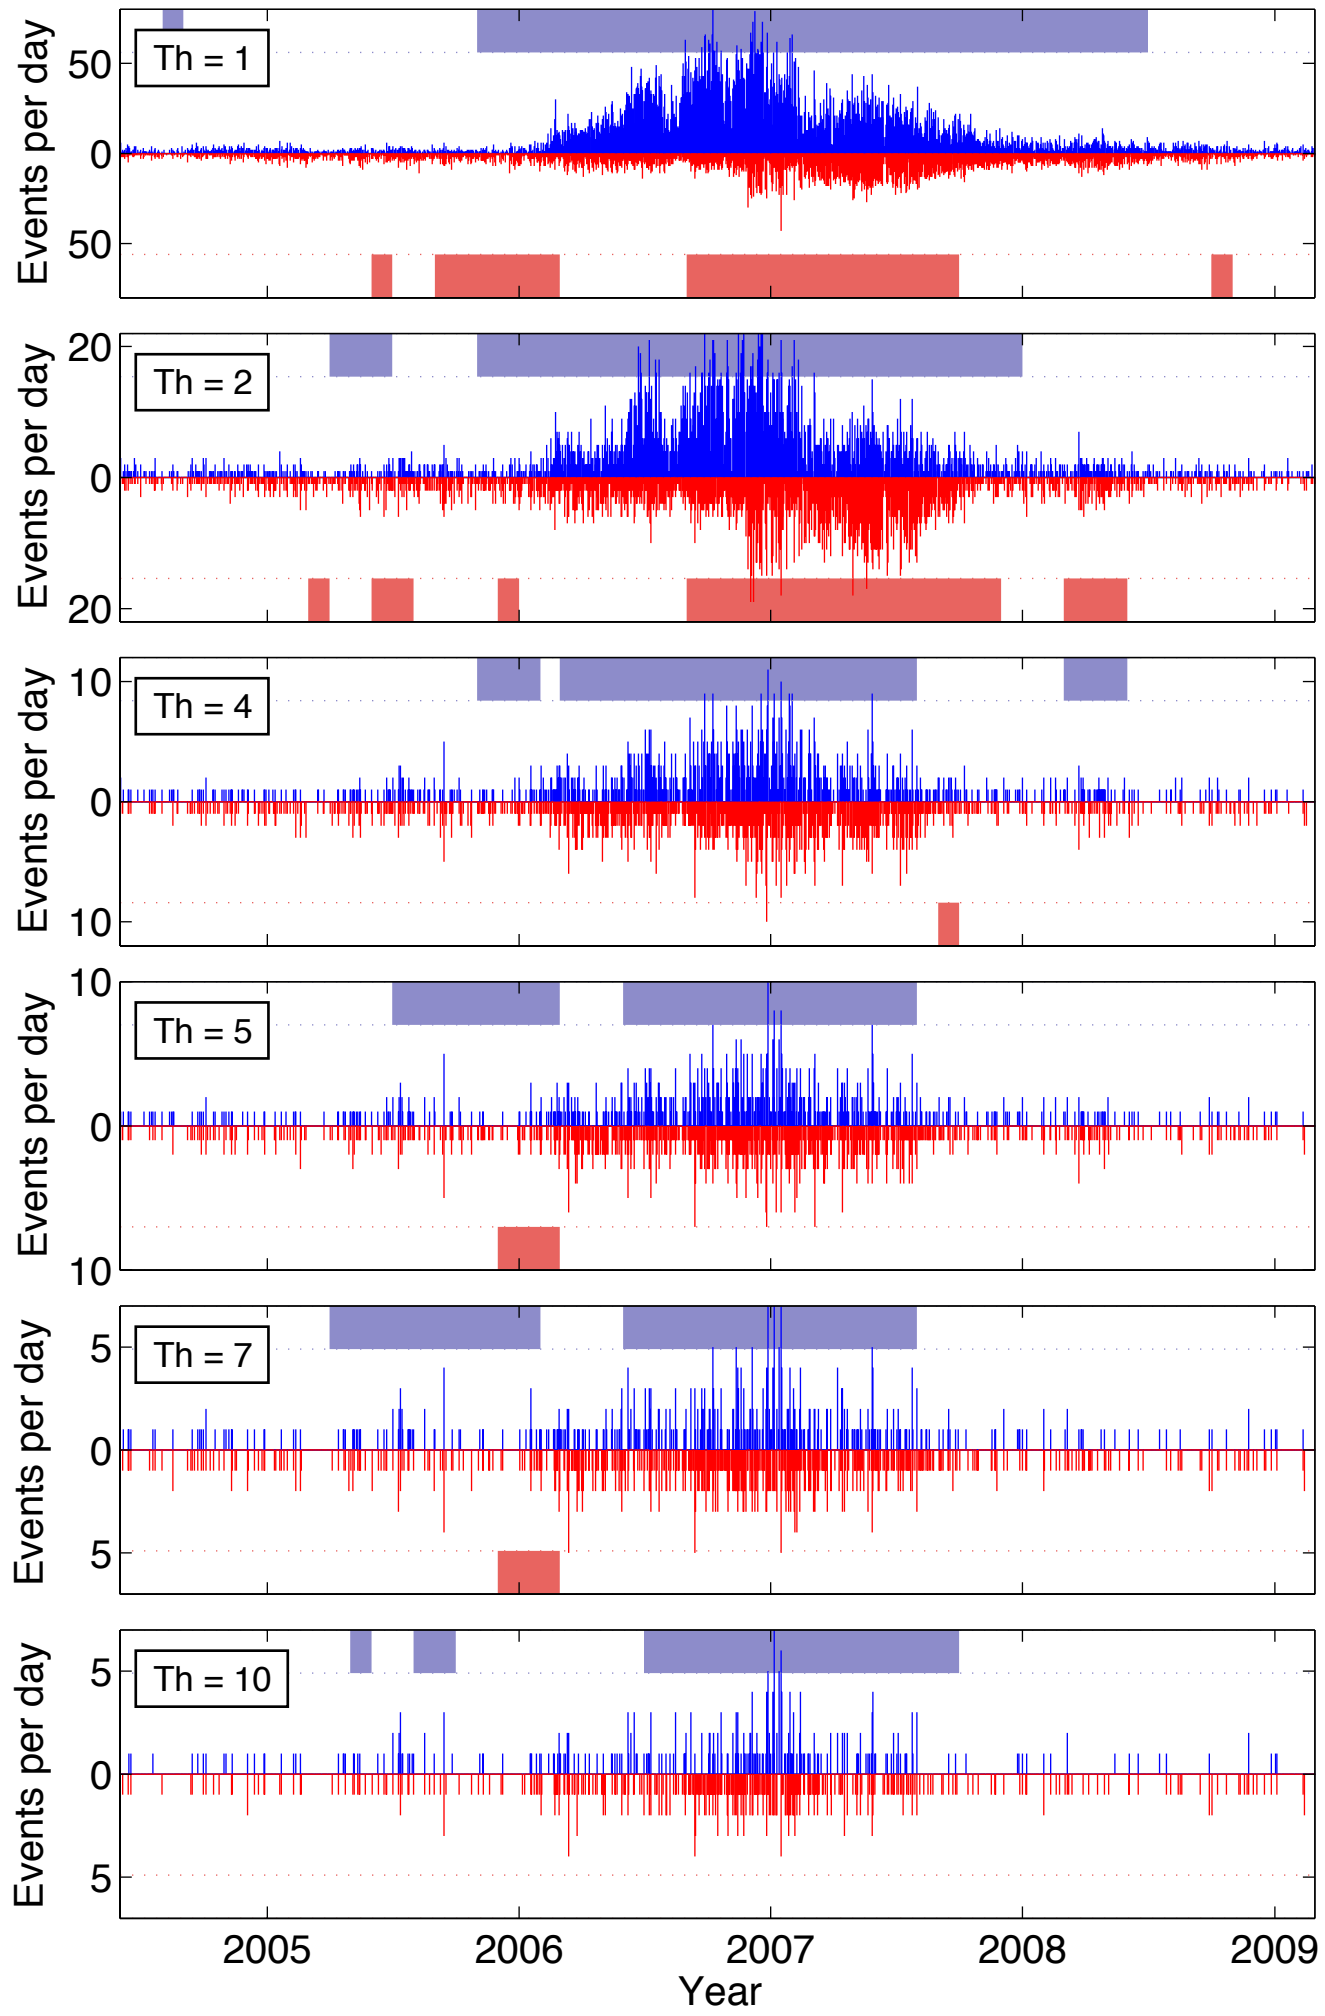

Supplement: MOESM12 [file 11893776]
